# Supplementary material for: Understanding model spread in sea ice volume by attribution of model differences in seasonal ice growth and melt
Source: Copernicus journal article supplement (doi:10.5194/tc-2021-351), 2021-11-22
Supplement: Supplementary file 1 [file tc-2021-351-supplement.pdf]

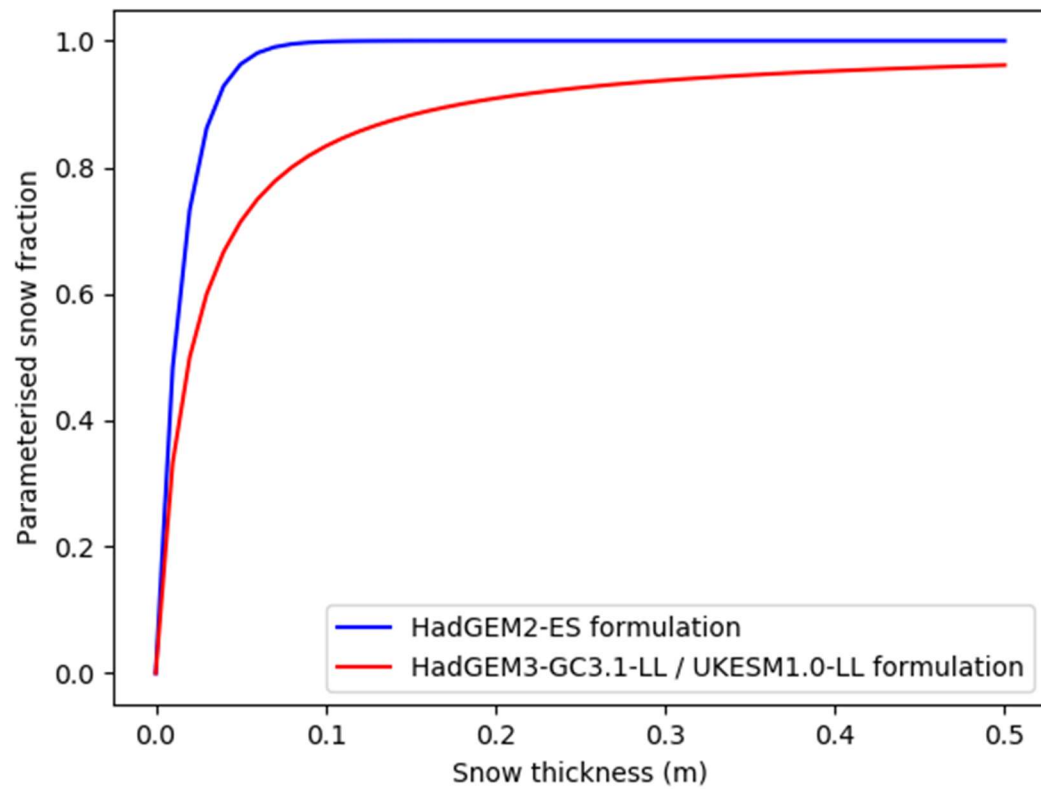

Figure S1. Snow area as a function of snow thickness in the HadGEM2-ES formulation (blue) and the HadGEM3-GC3.1-LL and UKESM1.0-LL formulations (red).
